# Supplementary material for: Sentiments Regarding COVID-19 Vaccination among Graduate Students in Singapore
Source: MDPI journal article supplement (doi:10.3390/vaccines9101141), 2021-10-06
Supplement: s1 [file s1]

# Supplemental Information

## Sentiments regarding COVID-19 Vaccination among Graduate Students in Singapore

Lee Jin Lim<sup>1†</sup>, Ashley J.W. Lim<sup>1†</sup>, Kevin K. Fong<sup>2†</sup> and Caroline G. Lee<sup>1,2,3,4\*</sup>

\*Corresponding authors' email: bchleec@nus.edu.sg

**This file includes:**

|                        |   |
|------------------------|---|
| <b>Figure S1</b> ..... | 2 |
| <b>Figure S2</b> ..... | 3 |
| <b>Figure S3</b> ..... | 4 |
| <b>Table S1</b> .....  | 5 |
| <b>Table S2</b> .....  | 6 |

Figure S1

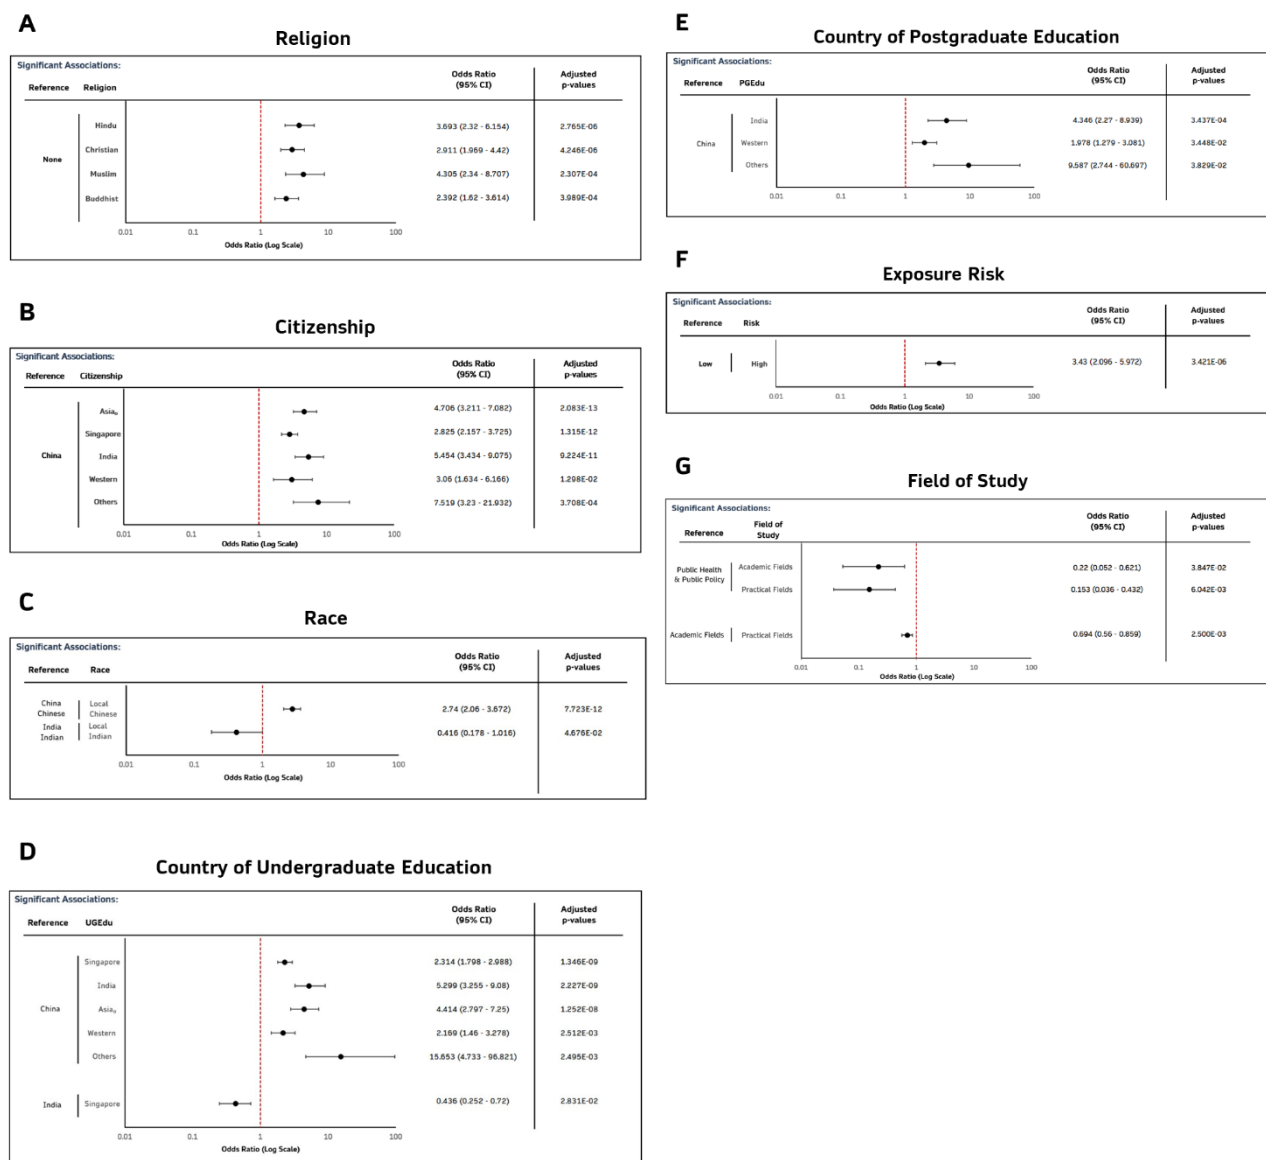

Figure S1. Odd ratio plots for demographic variables of the graduate students. The plots only show the associations that are significant after Bonferroni correction (Adjusted *P*-value <0.05).

Figure S2

A

Vaccination Concerns across Programmes

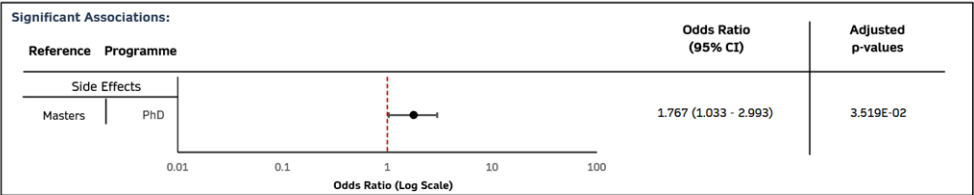

B

Vaccination Concerns across Citizenships

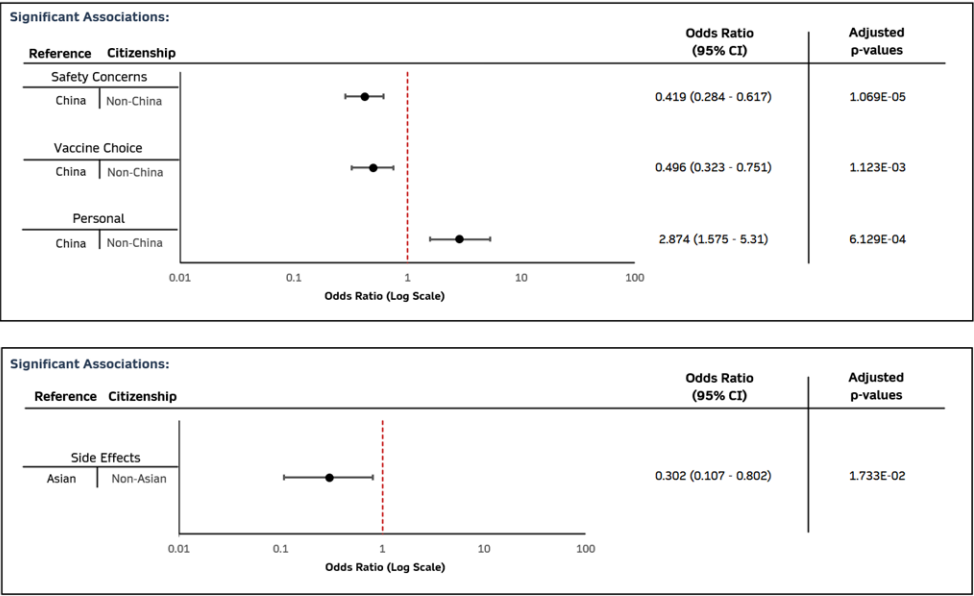

Figure S2. Odd ratio plots for vaccination concerns. The plots only show the associations that are significant after Bonferroni correction (Adjusted *P*-value <0.05).

**Figure S3**

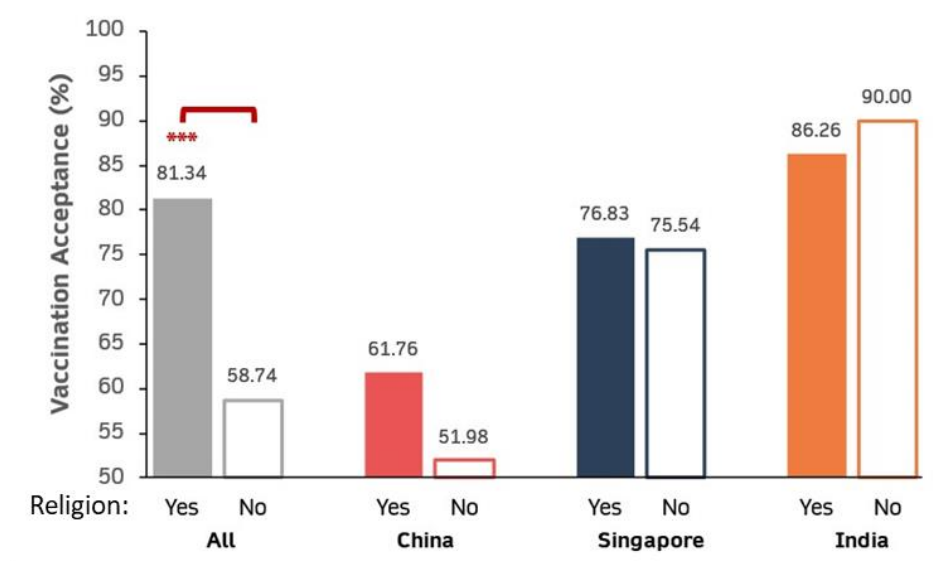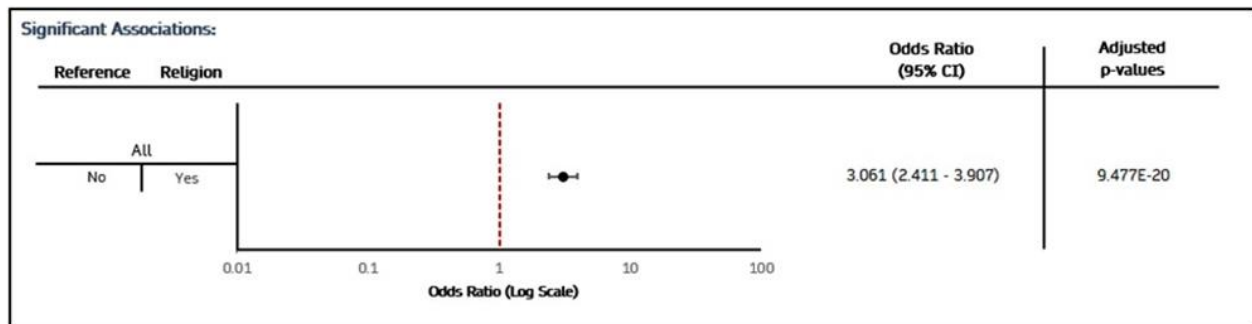

**Figure S3. Religion and vaccination sentiments.** (Top) Bar chart shows the percentage of vaccination acceptance of religious and non-religious graduate students from all countries, China, Singapore, and India respectively. (Bottom) Odd ratio plots for religion and vaccination sentiments. The plot only shows the association that is significant after Bonferroni correction (Adjusted P-value <0.05).

**Table S1. Summary for the background of the graduate students who responded to the survey.**

|                                                                                                                       | Variables             |                        | Number (Percentage) |
|-----------------------------------------------------------------------------------------------------------------------|-----------------------|------------------------|---------------------|
| Demographic                                                                                                           | Age (mean (SD))       |                        | 27.60 (4.55)        |
|                                                                                                                       | Gender (%)            | Female                 | 654 (41.2)          |
|                                                                                                                       |                       | Male                   | 935 (58.8)          |
|                                                                                                                       | Race (%)              | Chinese                | 339 (85.8)          |
|                                                                                                                       |                       | Indian                 | 37 (9.4)            |
|                                                                                                                       |                       | Malay                  | 14 (3.5)            |
|                                                                                                                       |                       | Others                 | 5 (1.3)             |
|                                                                                                                       | Religion (%)          | Buddhist               | 157 (10.7)          |
|                                                                                                                       |                       | Christian              | 173 (11.8)          |
|                                                                                                                       |                       | Hindu                  | 134 (9.2)           |
|                                                                                                                       |                       | Muslim                 | 80 (5.5)            |
|                                                                                                                       |                       | Taoist                 | 18 (1.2)            |
|                                                                                                                       |                       | Others                 | 48 (3.3)            |
|                                                                                                                       | Citizenship group (%) | None                   | 854 (58.3)          |
|                                                                                                                       |                       | Asia                   | 217 (13.7)          |
|                                                                                                                       |                       | China                  | 716 (45.1)          |
|                                                                                                                       |                       | Singapore              | 402 (25.3)          |
|                                                                                                                       |                       | Western                | 69 (4.3)            |
| India                                                                                                                 |                       | 152 (9.6)              |                     |
| Others                                                                                                                |                       | 33 (2.1)               |                     |
| Education                                                                                                             | Programme type (%)    | Master                 | 199 (12.5)          |
|                                                                                                                       |                       | PhD                    | 1390 (87.5)         |
|                                                                                                                       | Field of study (%)    | Arts & Social Sciences | 254 (16.0)          |
|                                                                                                                       |                       | Business               | 55 (3.5)            |
|                                                                                                                       |                       | Computing              | 154 (9.7)           |
|                                                                                                                       |                       | Design and Environment | 42 (2.6)            |
|                                                                                                                       |                       | Engineering            | 579 (36.4)          |
|                                                                                                                       |                       | ISEP                   | 81 (5.1)            |
|                                                                                                                       |                       | Law                    | 14 (0.9)            |
|                                                                                                                       |                       | Medical science        | 34 (2.1)            |
|                                                                                                                       |                       | Public Health          | 24 (1.5)            |
|                                                                                                                       |                       | Public Policy          | 13 (0.8)            |
|                                                                                                                       |                       | Science                | 339 (21.3)          |
|                                                                                                                       | STEM (%)              | Non-STEM               | 378 (23.8)          |
| STEM                                                                                                                  |                       | 1211 (76.2)            |                     |
| Others                                                                                                                | Exposure risk (%)     | No                     | 1455 (91.6)         |
|                                                                                                                       |                       | Yes                    | 134 (8.4)           |
|                                                                                                                       | Vaccination (%)       | No                     | 501 (31.5)          |
|                                                                                                                       |                       | Yes                    | 1088 (68.5)         |
| SD: Standard deviation; ISEP: Integrative Science and Engineering;<br>STEM: Science, Technology, Engineering and Math |                       |                        |                     |

**Table S2. Specific countries for citizenship, undergraduate education and postgraduate education of graduate students who responded to the survey.**

| No. | Country |                                 | Citizenship | Undergraduate | Postgraduate |
|-----|---------|---------------------------------|-------------|---------------|--------------|
| 1   | Asia    | Singapore                       |             |               |              |
| 2   |         | China                           |             |               |              |
| 3   |         | India                           |             |               |              |
| 4   |         | Malaysia                        |             |               |              |
| 5   |         | Indonesia                       |             |               |              |
| 6   |         | Korea, Republic of              |             |               |              |
| 7   |         | Thailand                        |             |               |              |
| 8   |         | Sri Lanka                       |             |               |              |
| 9   |         | Philippines                     |             |               |              |
| 10  |         | Taiwan                          |             |               |              |
| 11  |         | Hong Kong SAR, China            |             |               |              |
| 12  |         | Bangladesh                      |             |               |              |
| 13  |         | Pakistan                        |             |               |              |
| 14  |         | Japan                           |             |               |              |
| 15  |         | Nepal                           |             |               |              |
| 16  |         | Vietnam                         |             |               |              |
| 17  |         | Cambodia                        |             |               |              |
| 18  |         | Myanmar                         |             |               |              |
| 19  |         | Lao People's Democratic Rep     |             |               |              |
| 20  |         | Macao SAR, China                |             |               |              |
| 21  | Western | United States                   |             |               |              |
| 22  |         | United Kingdom                  |             |               |              |
| 23  |         | Netherlands                     |             |               |              |
| 24  |         | France                          |             |               |              |
| 25  |         | Canada                          |             |               |              |
| 26  |         | Germany                         |             |               |              |
| 27  |         | Italy                           |             |               |              |
| 28  |         | Peru                            |             |               |              |
| 29  |         | Brazil                          |             |               |              |
| 30  |         | Spain                           |             |               |              |
| 31  |         | Hungary                         |             |               |              |
| 32  |         | Finland                         |             |               |              |
| 33  |         | Mexico                          |             |               |              |
| 34  |         | Poland                          |             |               |              |
| 35  |         | Switzerland                     |             |               |              |
| 36  |         | Malta                           |             |               |              |
| 37  |         | New Zealand                     |             |               |              |
| 38  |         | Colombia                        |             |               |              |
| 39  |         | Denmark                         |             |               |              |
| 40  |         | Britain                         |             |               |              |
| 41  |         | Australia                       |             |               |              |
| 42  |         | Norway                          |             |               |              |
| 43  |         | Sweden                          |             |               |              |
| 44  |         | Costa Rica                      |             |               |              |
| 45  |         | Ireland                         |             |               |              |
| 46  | Others  | Turkey                          |             |               |              |
| 47  |         | Iran (Islamic Republic Of)      |             |               |              |
| 48  |         | Russian Federation              |             |               |              |
| 49  |         | Egypt                           |             |               |              |
| 50  |         | Romania                         |             |               |              |
| 51  |         | Israel                          |             |               |              |
| 52  |         | Republic of Serbia              |             |               |              |
| 53  |         | Morocco                         |             |               |              |
| 54  |         | Kazakhstan                      |             |               |              |
| 55  |         | Greece                          |             |               |              |
| 56  |         | Palestinian Territory, Occupied |             |               |              |
| 57  |         | Uzbekistan                      |             |               |              |
| 58  |         | Ghana                           |             |               |              |
| 59  |         | Mauritius                       |             |               |              |
| 60  |         | Saudi Arabia                    |             |               |              |
| 61  |         | Lebanon                         |             |               |              |

Countries in "Asia" refer to countries in Southern, Eastern and South-Eastern Asia (<https://www.worldometers.info/geography/how-many-countries-in-asia/>). Countries in "Western" are the western countries that are defined in <https://worldpopulationreview.com/country-rankings/western-countries>. Countries that are not under "Asia" and "Western" categories are labelled as "Others". Grey box: Not present in this survey for the specific category.
